# Supplementary material
Source: PubMed Central journal article supplement (PMC5278178)
Supplement: IAI.00654-16_zii999091948s1.pdf [file IAI.00654-16_zii999091948s1.pdf]

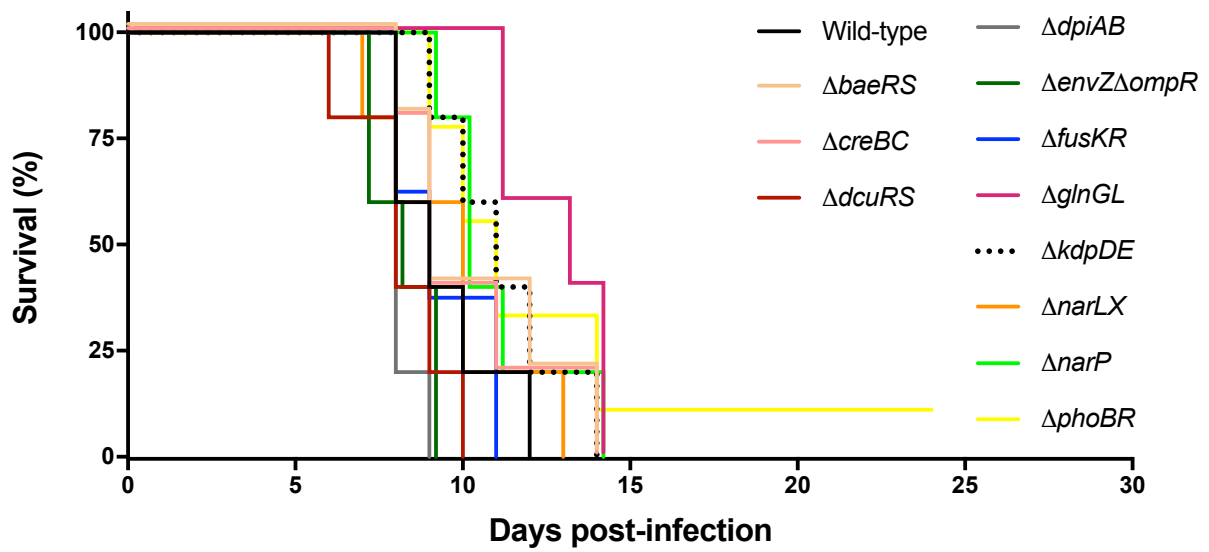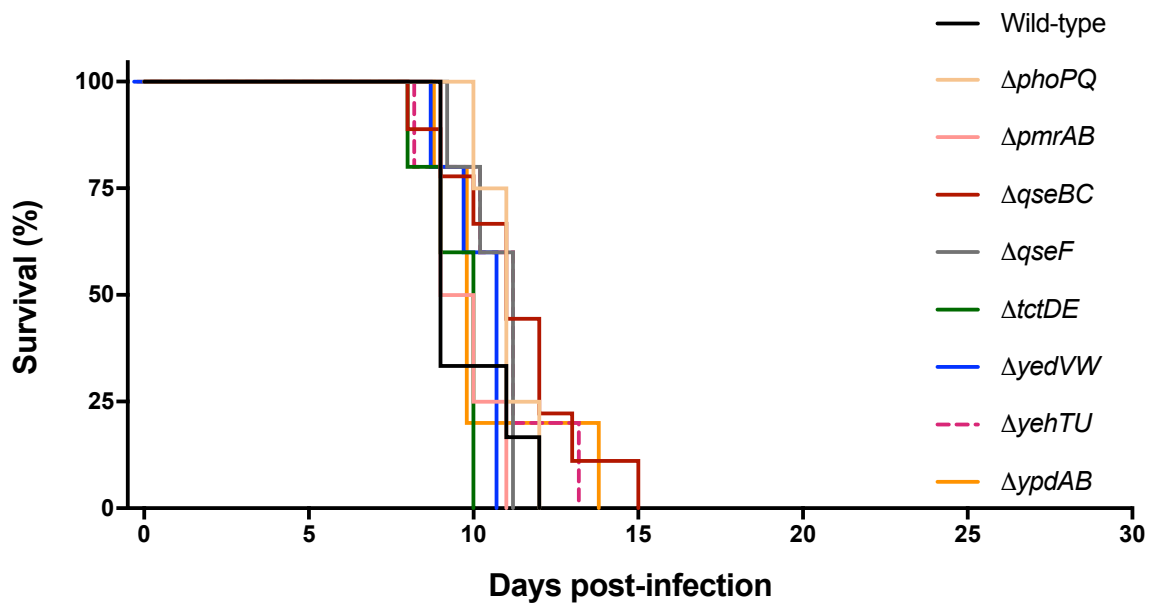

**Fig S1. Survival of female C3H/HeJ mice after infection with *C. rodentium*.** Animals were orally gavaged  $2-3 \times 10^8$  CFUs of *C. rodentium* wild-type or a TCS deletion strain. Animals were monitored for 30 days post-infection as described in the materials and methods (n=5-7). The log rank (Mantel-Cox) method was used to test for statistical significance, none were significantly different from wild-type.

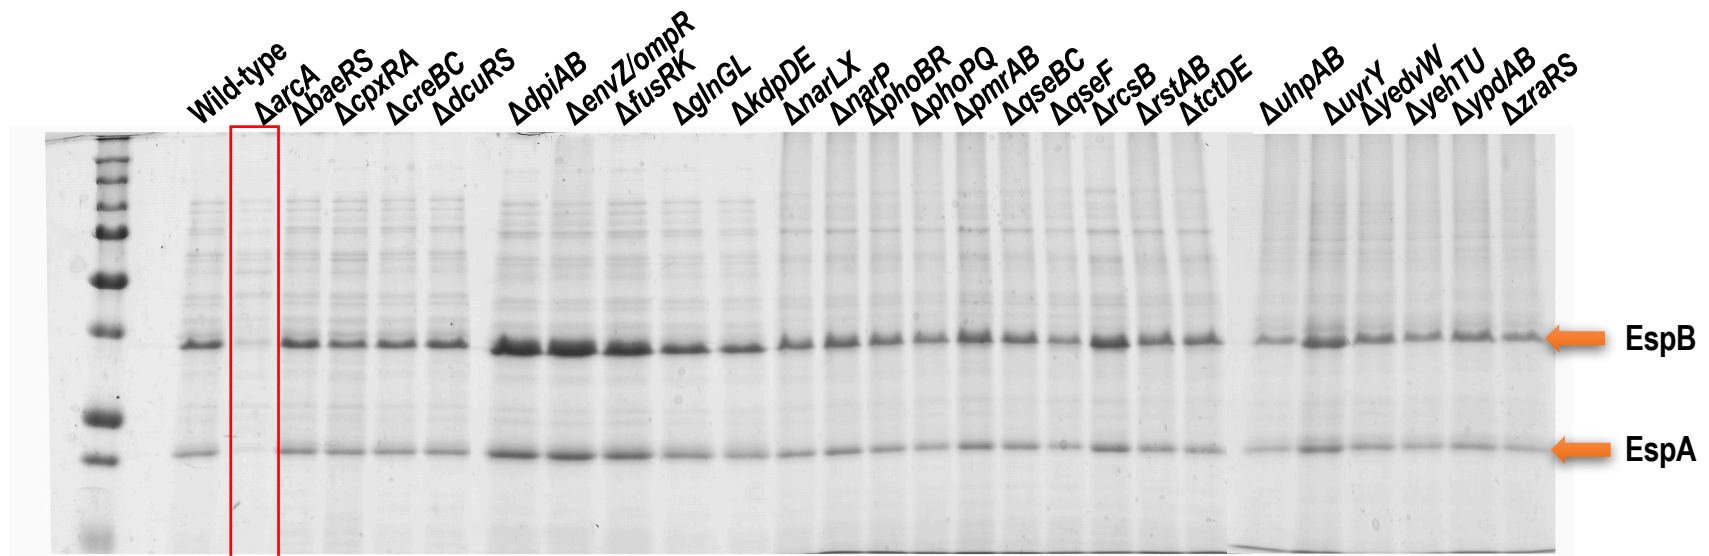

**Fig S2. T3S is functional in all TCS deletion strains with the exception of  $\Delta arcA$ .** Total secreted proteins of the *C. rodentium* wild-type and TCS deletion strains were prepared, as described in Materials and Methods, and separated on 10% SDS-PAGE gels subsequently stained with Coomassie blue.

**TABLE S1 Strains and plasmids used in this study**

| Strain or plasmid            | Description                     | Reference or source |
|------------------------------|---------------------------------|---------------------|
| <i>Citrobacter rodentium</i> |                                 |                     |
| Wild-type                    | <i>C. rodentium</i> DBS100      | (1)                 |
| $\Delta arcA$                | DBS100 $\Delta arcA$            | This study          |
| $\Delta baeRS$               | DBS100 $\Delta baeRS$           | This study          |
| $\Delta cpxRA$               | DBS100 $\Delta cpxRA$           | (2)                 |
| $\Delta creBC$               | DBS100 $\Delta creBC$           | This study          |
| $\Delta dcuRS$               | DBS100 $\Delta dcuRS$           | This study          |
| $\Delta dpiAB$               | DBS100 $\Delta dpiAB$           | This study          |
| $\Delta fusRK$               | DBS100 $\Delta fusRK$           | This study          |
| $\Delta glnGL$               | DBS100 $\Delta glnGL$           | This study          |
| $\Delta kdpED$               | DBS100 $\Delta kdpED$           | This study          |
| $\Delta narLX$               | DBS100 $\Delta narLX$           | This study          |
| $\Delta narP$                | DBS100 $\Delta narP$            | This study          |
| $\Delta ompR\Delta envZ$     | DBS100 $\Delta ompR\Delta envZ$ | This study          |
| $\Delta phoBR$               | DBS100 $\Delta phoBR$           | This study          |
| $\Delta phoPQ$               | DBS100 $\Delta phoPQ$           | (3)                 |
| $\Delta pmrAB$               | DBS100 $\Delta pmrAB$           | (4)                 |
| $\Delta qseBC$               | DBS100 $\Delta qseBC$           | This study          |
| $\Delta qseF$                | DBS100 $\Delta qseF$            | This study          |
| $\Delta rcsB$                | DBS100 $\Delta rcsB$            | This study          |
| $\Delta rstAB$               | DBS100 $\Delta rstAB$           | This study          |
| $\Delta tctDE$               | DBS100 $\Delta tctDE$           | This study          |
| $\Delta uhpAB$               | DBS100 $\Delta uhpAB$           | This study          |
| $\Delta uvrY$                | DBS100 $\Delta uvrY$            | This study          |
| $\Delta yedWV$               | DBS100 $\Delta yedWV$           | This study          |
| $\Delta yehTU$               | DBS100 $\Delta yehTU$           | This study          |
| $\Delta ypdBA$               | DBS100 $\Delta ypdBA$           | This study          |
| $\Delta zraRS$               | DBS100 $\Delta zraRS$           | This study          |
| <i>Escherichia coli</i>      |                                 |                     |

|                  |                                                                                                                                                         |            |
|------------------|---------------------------------------------------------------------------------------------------------------------------------------------------------|------------|
| DH5 $\alpha$     | HuA2 $\Delta(lac)U169$ <i>phoA glnV44</i> $\phi 80lacZ\Delta M15$ <i>endA recA hsdR17</i> ( $r_M^-$ $m_K^+$ ) <i>thi-1 gyrA96 relA1</i>                 | Invitrogen |
| DH5 $\alpha$ pir | K-12 $F^-$ $\phi 80lacZ\Delta M15$ <i>endA recA hsdR17</i> ( $r_M^-$ $m_K^+$ ) <i>supE44 thi-1 gyrA96 relA1</i> $\Delta(lacZYA-argF)U169$ $\lambda$ pir |            |
| $\chi 7213$      | <i>thr-1 leuB6 fhuA21 lacY1 glnV44 recA1 asdA4 thi-1</i> RP4-2-Tc::Mu [-pir] Kan <sup>r</sup>                                                           | (5)        |

Plasmids

---

|                         |                                                                    |            |
|-------------------------|--------------------------------------------------------------------|------------|
| pRE112                  | Sucrose-sensitive ( <i>sacB1</i> ) suicide vector; Cm <sup>r</sup> | (6)        |
| p $\Delta$ <i>arcA</i>  | $\Delta$ <i>arcA</i> deletion construct in pRE112                  | This study |
| p $\Delta$ <i>baeRS</i> | $\Delta$ <i>baeRS</i> deletion construct in pRE112                 | This study |
| p $\Delta$ <i>creBC</i> | $\Delta$ <i>creBC</i> deletion construct in pRE112                 | This study |
| p $\Delta$ <i>dcuRS</i> | $\Delta$ <i>dcuRS</i> deletion construct in pRE112                 | This study |
| p $\Delta$ <i>dpiAB</i> | $\Delta$ <i>dpiAB</i> deletion construct in pRE112                 | This study |
| p $\Delta$ <i>fusRK</i> | $\Delta$ <i>fusRK</i> deletion construct in pRE112                 | This study |
| p $\Delta$ <i>glnGL</i> | $\Delta$ <i>glnGL</i> deletion construct in pRE112                 | This study |
| p $\Delta$ <i>kdpED</i> | $\Delta$ <i>kdpED</i> deletion construct in pRE112                 | This study |
| p $\Delta$ <i>narLX</i> | $\Delta$ <i>narLX</i> deletion construct in pRE112                 | This study |
| p $\Delta$ <i>narP</i>  | $\Delta$ <i>narP</i> deletion construct in pRE112                  | This study |
| p $\Delta$ <i>phoBR</i> | $\Delta$ <i>phoBR</i> deletion construct in pRE112                 | This study |
| p $\Delta$ <i>qseBC</i> | $\Delta$ <i>qseBC</i> deletion construct in pRE112                 | This study |
| p $\Delta$ <i>qseF</i>  | $\Delta$ <i>qseF</i> deletion construct in pRE112                  | This study |
| p $\Delta$ <i>rcsB</i>  | $\Delta$ <i>rcsB</i> deletion construct in pRE112                  | This study |
| p $\Delta$ <i>rstAB</i> | $\Delta$ <i>rstAB</i> deletion construct in pRE112                 | This study |
| p $\Delta$ <i>tctDE</i> | $\Delta$ <i>tctDE</i> deletion construct in pRE112                 | This study |
| p $\Delta$ <i>uhpAB</i> | $\Delta$ <i>uhpAB</i> deletion construct in pRE112                 | This study |
| p $\Delta$ <i>uvrY</i>  | $\Delta$ <i>uvrY</i> deletion construct in pRE112                  | This study |
| p $\Delta$ <i>yedWV</i> | $\Delta$ <i>yedWV</i> deletion construct in pRE112                 | This study |
| p $\Delta$ <i>yehTU</i> | $\Delta$ <i>yehTU</i> deletion construct in pRE112                 | This study |
| p $\Delta$ <i>ydpBA</i> | $\Delta$ <i>ydpBA</i> deletion construct in pRE112                 | This study |
| p $\Delta$ <i>zraRS</i> | $\Delta$ <i>zraRS</i> deletion construct in pRE112                 | This study |

---

## REFERENCES

1. **Schauer DB, Falkow S.** 1993. The *eae* gene of *Citrobacter freundii* biotype 4280 is necessary for colonization in transmissible murine colonic hyperplasia. *Infect Immun* **61**:4654-4661.
2. **Thomassin JL, Giannakopoulou N, Zhu L, Gross J, Salmon K, Leclerc JM, Daigle F, Le Moual H, Gruenheid S.** 2015. The CpxRA two-component system is essential for *Citrobacter rodentium* virulence. *Infect Immun* **83**:1919-1928.
3. **Le Sage V, Zhu L, Lepage C, Portt A, Viau C, Daigle F, Gruenheid S, Le Moual H.** 2009. An outer membrane protease of the omptin family prevents activation of the *Citrobacter rodentium* PhoPQ two-component system by antimicrobial peptides. *Mol Microbiol* **74**:98-111.
4. **Viau C, Le Sage V, Ting DK, Gross J, Le Moual H.** 2011. Absence of PmrAB-mediated phosphoethanolamine modifications of *Citrobacter rodentium* lipopolysaccharide affects outer membrane integrity. *J Bacteriol* **193**:2168-2176.
5. **Roland K, Curtiss R, 3rd, Sizemore D.** 1999. Construction and evaluation of a  $\Delta$ *cya*  $\Delta$ *crp* *Salmonella typhimurium* strain expressing avian pathogenic *Escherichia coli* O78 LPS as a vaccine to prevent airsacculitis in chickens. *Avian Dis* **43**:429-441.
6. **Edwards RA, Keller LH, Schifferli DM.** 1998. Improved allelic exchange vectors and their use to analyze 987P fimbria gene expression. *Gene* **207**:149-157.

**TABLE S2 Primers used for qPCR**

| Gene        | Forward primer (5'→3')   | Reverse primer (5'→3')   | Product size (bp) |
|-------------|--------------------------|--------------------------|-------------------|
| 16S         | TGTCTACTTGGAGGTTGTGCCCTT | TGCAGTCTTCCGTGGATGTCAAGA | 193               |
| <i>arcA</i> | GCCCGGATGGCGAGCAATAC     | CAGCTCGCGACCGGTCATTT     | 125               |
| <i>arcB</i> | CTATCTGAGCGTGCTGGAGTCAAA | CCAGCTGTTGCAGATGACGAA    | 119               |
| <i>baeR</i> | CTTGACCTGACTCCCCCGGA     | CGATCGGTCACCACCCGGTA     | 122               |
| <i>barA</i> | CCTGATGGATATTCAGATGCC    | CGCCAGATAGTCATTCATAACC   | 163               |
| <i>cpxR</i> | GGAACAGGCGCTGGAGCTTC     | ACGGGGGTCTGGTGTGTCTG     | 120               |
| <i>creB</i> | CGCTGTGCTTACGCGCTAT      | CGGCCAGACGCTTCCATC       | 102               |
| <i>dcuR</i> | TGGCGAATGCGGTGAATATC     | ACGTCCCGTTACGCCATAAT     | 107               |
| <i>dpiA</i> | CAGCGCGAGTCAGCGACAAA     | TTCACCGCGTTCAGCGTCAG     | 108               |
| <i>fusR</i> | GCTTACTCCGCGAGAGCGTG     | GGCGCGATACACATGGACCG     | 112               |
| <i>glnG</i> | TGATTACCTGCCAAAACCGT     | TCGGACCGTTGATCTGGATA     | 113               |
| <i>kdpE</i> | GTCCGGCAGACCGAGATCGA     | AGGCCATTCGCCGCTTTCTG     | 140               |
| <i>narL</i> | GCCAGGCATGAACGGACTGG     | CGCCGTCACGACGTCTTCTT     | 109               |
| <i>narP</i> | CGAACCGTCTCGACCCCGAT     | TAATTTGCGCCGTCACGCCA     | 108               |
| <i>narQ</i> | GTTGCAGATCATCCGTGAAG     | CGAATATACACCGTGTGGTTG    | 111               |
| <i>ompR</i> | GAAACCGTTTAACCCGCGTGAACT | AACTTACCAAAGGCAATCACCGCC | 117               |
| <i>phoB</i> | CTCGACATGGGACCGACCGA     | TGCACATCGACCGTGCATC      | 137               |
| <i>phoP</i> | AGCTGTAACATCAAGGCGTC     | GTCGATCAACGATGAGGTGA     | 111               |
| <i>pmrA</i> | GGATCAGCACCGGCAGGGTA     | GCAATGTCTGGAGAGCGGCC     | 122               |
| <i>qseB</i> | ACTGGTTCACCGACGGTCGT     | AATGTCGCGCCCGTCCATTC     | 104               |
| <i>qseF</i> | GCGACGCAAAGGGGGTCTT      | ACGATAGACTCGCGCCAGCT     | 128               |
| <i>resB</i> | GAAATCGCCAAGAAGCTGAAC    | CAGGGTCACAGAAGAGAGATAG   | 123               |
| <i>resC</i> | TGGGGAGAGGCCACGCTATG     | TCCGCTGACGACCTGTTGGT     | 143               |
| <i>rpoD</i> | ATCAAAGCGAAAGGTCGTAGCCAC | CCATCATCACGCGCATACTGTTCA | 130               |
| <i>rstA</i> | AGGCGCACCGAACGATTGAC     | GCGCGTTTGCCTCTGCATTT     | 137               |
| <i>tctD</i> | GGAAGATAACCGTGAGCTGG     | AACTCTCGCTATGCAACAGG     | 116               |
| <i>uhpA</i> | CCATCATGCTTTTCGGTACAC    | CTACAGCGTTTGGAGAGGA      | 88                |
| <i>uvrY</i> | CGCGAGTTGCAGATTATGCTGAT  | TTACACAGGCCATGGCGAATTG   | 176               |
| <i>yedW</i> | TTTGCCTTACTGCCCGCGAC     | TTCTCAACTGCGCGCTACC      | 126               |
| <i>yehT</i> | GCCAGGAGCGCAGTAAGCAG     | GCGACGTCGTCCATCTGCAA     | 115               |
| <i>ypdB</i> | ACAGCACAACCGCGTCGATG     | GCTTCCACCGCGTGCTCTTT     | 144               |
| <i>zraR</i> | TTCCCCTGCTGGCTGAGCAT     | GGCATTTCAGCTCGCGGA       | 137               |

|             |                       |                      |     |
|-------------|-----------------------|----------------------|-----|
| <i>wcaA</i> | TTCGGGCGATAAAATCGGTG  | GAATTGACCGCGTTATGGGT | 151 |
| <i>espA</i> | ATCTTACGGCTGAGTTAAGCG | CGGCTATTATCCACCGTCG  | 97  |
| <i>espB</i> | TTCATCTGTCCTGGGGATT   | ACTTCAGAGGCGGTATTGAC | 124 |

---

**TABLE S3 Primers used to generate gene deletion strains**

| <b>Deletion strain</b> | <b>Primer</b> | <b>Sequence (5'→3')</b>          | <b>Restriction site</b> |
|------------------------|---------------|----------------------------------|-------------------------|
| <i>ΔarcA</i>           | arcA_1        | CTAGGAGCTCGACATCCTGAAGCGCATCGA   | <i>SacI</i>             |
|                        | arcA_2        | CTAGCTCGAGGATAAGAATGTGCGGGGTCT   | <i>XhoI</i>             |
|                        | arcA_3        | CTAGCTCGAGTAAGCGGTTTACCACCGTCA   | <i>XhoI</i>             |
|                        | arcA_4        | CTAGTCTAGAGATGACAGGCAGGTACAGCA   | <i>XbaI</i>             |
| <i>ΔbaeRS</i>          | baeRS_1       | CTAGGAGCTCCAGTAAAGGCATGGGCTTGT   | <i>SacI</i>             |
|                        | baeRS_2       | CTAGGCTAGCAAAATCGCCAGAAACAGCTTG  | <i>NheI</i>             |
|                        | baeRS_3       | CTAGGCTAGCCGCTGCAGAATGGCTTAAC    | <i>NheI</i>             |
|                        | baeRS_4       | CTAGTCTAGACCGGGTCAGACATAATCAG    | <i>XbaI</i>             |
| <i>ΔcreBC</i>          | creBC_1       | CTAGGAGCTCCTCTGCAGGTGCCACTTGA    | <i>SacI</i>             |
|                        | creBC_2       | CTAGGCTAGCCATCTGCTGCATATTTCTTCCC | <i>NheI</i>             |
|                        | creBC_3       | CTAGGCTAGCCTTCACCGTCACTTCACATAA  | <i>NheI</i>             |
|                        | creBC_4       | CTAGTCTAGACAGCAGATACTGCATCGGAT   | <i>XbaI</i>             |
| <i>ΔdcuRS</i>          | dcuRS_1       | CTAGGAGCTCGTCACTACCTATCTGAGCACC  | <i>SacI</i>             |
|                        | dcuRS_2       | CTAGGCTAGCCATGGTGGTCCCGGATTGAC   | <i>NheI</i>             |
|                        | dcuRS_3       | CTAGGCTAGCTGTGCTAGTAGACGCCAACGGC | <i>NheI</i>             |
|                        | dcuRS_4       | CTAGTCTAGAGATCTTTACCGCGGAACCAG   | <i>XbaI</i>             |
| <i>ΔdpiAB</i>          | dpiAB_1       | CTAGGAGCTCACCATAATGTCGGGAACCGT   | <i>SacI</i>             |
|                        | dpiAB_2       | CTAGGCTAGCCGAAATGCTAACTGGCGAAA   | <i>NheI</i>             |
|                        | dpiAB_3       | CTAGGCTAGCGCATTATCGCGGGTGATACA   | <i>NheI</i>             |
|                        | dpiAB_4       | CTAGTCTAGATCCAGACCGCTGCAATACAT   | <i>XbaI</i>             |
| <i>ΔfusRK</i>          | fusKR_1       | CTAGGAGCTCGGCGGCTGCAGGTTGATAAT   | <i>SacI</i>             |
|                        | fusKR_2       | CTAGGCTAGCGTCCTCTTCGAGACTGAGTA   | <i>NheI</i>             |
|                        | fusKR_3       | CTAGGCTAGCCCCACAAATTTGCAACAAACCC | <i>NheI</i>             |
|                        | fusKR_4       | CTAGTCTAGAAAGGCCAATCAGCATTGCG    | <i>XbaI</i>             |
| <i>ΔglnGL</i>          | glnGL_1       | CTAGGAGCTCCTCCTACAAGCGTCTGGTCC   | <i>SacI</i>             |
|                        | glnGL_2       | CTAGGCTAGCCATCTGCAGTCTCCTGACAG   | <i>NheI</i>             |
|                        | glnGL_3       | CTAGGCTAGCGGAATGGAGTAAGCGTTCAC   | <i>NheI</i>             |
|                        | glnGL_4       | CTAGTCTAGAGAGGTCCAGCGTCTGGTTAA   | <i>XbaI</i>             |
| <i>ΔkdpED</i>          | kdpDE_1       | CTAGGAGCTCGGCGCCGTTTATCGGGATT    | <i>SacI</i>             |



|               |         |                                   |              |
|---------------|---------|-----------------------------------|--------------|
|               | kdpDE_2 | CTAGGCTAGCGTTTCCACCACGCCAACCA     | <i>NheI</i>  |
|               | kdpDE_3 | CTAGGCTAGCCCACAGGATGGCGCAATAAT    | <i>NheI</i>  |
|               | kdpDE_4 | CTAGTCTAGAGACGATGAAGTACCGTTCAG    | <i>XbaI</i>  |
| <i>ΔnarLX</i> | narLX_1 | CTAGGAGCTCGAAGCTGATGTTCCGCCATAC   | <i>SacI</i>  |
|               | narLX_2 | CTAGGCTAGCACCTTCTTCCTTCAGGTTGC    | <i>NheI</i>  |
|               | narLX_3 | CTAGGCTAGCTGCATCAGGAACGTATCTTCT   | <i>NheI</i>  |
|               | narLX_4 | CTAGTCTAGAAACAGGCGAAACAGTTTGCTT   | <i>XbaI</i>  |
| <i>ΔnarP</i>  | narP_1  | CTAGGAGCTCCAAGTTCCTGTGGGCAACTT    | <i>SacI</i>  |
|               | narP_2  | CTAGGCTAGCAGGCATAGTTATCTCCTGAGA   | <i>NheI</i>  |
|               | narP_3  | CTAGGCTAGCCAGTGACGAAAACCACGTTG    | <i>NheI</i>  |
|               | narP_4  | CTAGTCTAGAGCATCATTCGATATCGCCAC    | <i>XbaI</i>  |
| <i>ΔphoBR</i> | phoBR_1 | CTAGGAGCTCAGCGTCCCGATGTAAATGTC    | <i>SacI</i>  |
|               | phoBR_2 | CTAGGCTAGCCAGAATACGTCTCGCCATGA    | <i>NheI</i>  |
|               | phoBR_3 | CTAGGCTAGCCTGACAGGCGATTGTAATGC    | <i>NheI</i>  |
|               | phoBR_4 | CTAGTCTAGATGCACGTAAGCGTGGAGGAT    | <i>XbaI</i>  |
| <i>ΔqseBC</i> | qseBC_1 | GCTCTAGACGCGCCGTCTTCTTTGGTCCAGA   | <i>XbaI</i>  |
|               | qseBC_2 | GCGATATCGGTGAACCAGTCGACGCAAAAGC   | <i>EcoRV</i> |
|               | qseBC_3 | GCGATATCGGCAATCTGCCGAGGGAGGATT    | <i>EcoRV</i> |
|               | qseBC_4 | GCGAGCTCCGCGTAGCCGTGGCAGCCTTCTT   | <i>SacI</i>  |
| <i>ΔqseF</i>  | qseF_1  | CGGGGTACCCTGAGTATCGCCCGGGATTG     | <i>KpnI</i>  |
|               | qseF_2  | CTAGGCTAGCGCTTATCATGGCGATACCTC    | <i>NheI</i>  |
|               | qseF_3  | CTAGGCTAGCGAGTAGCTCCGCAACATAACC   | <i>NheI</i>  |
|               | qseF_4  | CTAGTCTAGAGCACAGAGTGAAGGTCTGCG    | <i>XbaI</i>  |
| <i>ΔrcsB</i>  | rcsB_1  | CTAGGAGCTCGCGAAGTCGACAACCTGCAT    | <i>SacI</i>  |
|               | rcsB_2  | CTAGGCTAGCGTTCATGTATAAGGCTACCTTGC | <i>NheI</i>  |
|               | rcsB_3  | CTAGGCTAGCGAGTAATCGCTTTTCGCCGT    | <i>NheI</i>  |
|               | rcsB_4  | CTAGTCTAGAGCTGATCAGCATGATGGACG    | <i>XbaI</i>  |
| <i>ΔrstAB</i> | rstAB_1 | CTAGGAGCTCTTTACCGATTACGTGGTGGAG   | <i>SacI</i>  |
|               | rstAB_2 | CTAGGCTAGCACTTCCGGATCGTCTTCAACA   | <i>NheI</i>  |
|               | rstAB_3 | CTAGGCTAGCGATCGGTTTCTCAGGCGATG    | <i>NheI</i>  |
|               | rstAB_4 | CTAGTCTAGACTATCTCAGCGAAGAGGAGT    | <i>XbaI</i>  |

|               |         |                                     |                |
|---------------|---------|-------------------------------------|----------------|
| <i>ΔtctDE</i> | tctDE_1 | CGGGGTACCGCGGTCTGCTGGAGCTTTT        | <i>KpnI</i>    |
|               | tctDE_2 | CTAGGCTAGCGCCAGCTCACGGTTATCTTC      | <i>NheI</i>    |
|               | tctDE_3 | CTAGGCTAGCGACGCAGTAACCTTCCTTTTG     | <i>NheI</i>    |
|               | tctDE_4 | CTAGTCTAGAGTGATGGCGAGATCAGAATAG     | <i>XbaI</i>    |
| <i>ΔuhpAB</i> | uhpAB_1 | CTAGGAGCTCGCCTGATGATGAACATTCAG      | <i>SacI</i>    |
|               | uhpAB_2 | CTAGGCTAGCGGTGATCATGATTTTGTCTGAC    | <i>NheI</i>    |
|               | uhpAB_3 | CTAGGCTAGCGCCTAAGGAGCGGCATGTTT      | <i>NheI</i>    |
|               | uhpAB_4 | CTAGTCTAGACCTCTTTGTGCGAGCATTCC      | <i>XbaI</i>    |
| <i>ΔuvrY</i>  | uvrY_1  | GCTCTAGACCGCGGAGTATACCATAAGC        | <i>XbaI</i>    |
|               | uvrY_2  | CTCCGCATTACCAGTTCGTGGTCATCAA        | - <sup>a</sup> |
|               | uvrY_3  | AACTGGTGAATGCGGAGACGTTAACAAGC       | - <sup>a</sup> |
|               | uvrY_4  | GCGAGCTCCGTTCCGGAAAGGACCAAAAT       | <i>SacI</i>    |
| <i>ΔyedWV</i> | yedVW_1 | CTAGGAGCTCCCACGAACTGGATCGCCAAT      | <i>SacI</i>    |
|               | yedVW_2 | CTAGGCTAGCGTTGTCTTCAATCAGTAAAATCTTC | <i>NheI</i>    |
|               | yedVW_3 | CTAGGCTAGCTGAGTGCGGGTTGCGGTCGC      | <i>NheI</i>    |
|               | yedVW_4 | CTAGTCTAGACGCTGACCGGATACATCTTATTC   | <i>XbaI</i>    |
| <i>ΔyehTU</i> | yehTU_1 | CTAGGAGCTCCGGGTGGTGCATGGATATT       | <i>SacI</i>    |
|               | yehTU_2 | CGGGGTACCGAAACACGCACATTTGCTGAA      | <i>KpnI</i>    |
|               | yehTU_3 | CGGGGTACCCGTCGTATCTGAAAAGTTTG       | <i>KpnI</i>    |
|               | yehTU_4 | CTAGTCTAGATGGAGGCTTTCCTCAACGC       | <i>XbaI</i>    |
| <i>ΔypdBA</i> | ypdAB_1 | CTAGGAGCTCGCTTGGGTTAGGCACCAGTA      | <i>SacI</i>    |
|               | ypdAB_2 | CTAGGCTAGCCCGCCAGCAGCATAGTAAATA     | <i>NheI</i>    |
|               | ypdAB_3 | CTAGGCTAGCGAAGGAGTTCAGGCAGTTAAT     | <i>NheI</i>    |
|               | ypdAB_4 | CTAGTCTAGATGATCCCGGACAGCAAGTAT      | <i>XbaI</i>    |
| <i>ΔzraRS</i> | zraRS_1 | CTAGGAGCTCGTCAATGGACGTGAGCGTGG      | <i>SacI</i>    |
|               | zraRS_2 | CTAGGCTAGCCATACTCTCCTTCGCCTTTC      | <i>NheI</i>    |
|               | zraRS_3 | CTAGGCTAGCCGTTAGTTTTGCTCGCGTTC      | <i>NheI</i>    |
|               | zraRS_4 | CTAGTCTAGAGGTCGCCGAAAGTCGAAACC      | <i>XbaI</i>    |

<sup>a</sup> This construct was generated by overlap PCR.

**TABLE S4 Two-component signaling systems of *C. rodentium* and *E. coli*<sup>a</sup>.**

| Two-component System | Putative Function         | <i>C. rodentium</i> | <i>E. coli</i> K12 | EHEC | EPEC |
|----------------------|---------------------------|---------------------|--------------------|------|------|
| ArcA/ArcB            | Anaerobic respiration     | +                   | +                  | +    | +    |
| AtoC/AtoS            | Acetoacetate metabolism   | -                   | +                  | -    | +    |
| BaeR/BaeS            | Multidrug efflux          | +                   | +                  | +    | +    |
| CpxR/CpxA            | Envelope stress response  | +                   | +                  | +    | +    |
| CreB/CreC            | Phosphate regulation      | +                   | +                  | +    | +    |
| CusR/CusS            | Metal efflux              | -                   | +                  | +    | +    |
| DcuR/DcuS            | Response to dicarboxylate | +                   | +                  | +    | +    |
| DpiA/DpiB            | Citrate fermentation      | +                   | +                  | +    | +    |
| EvgA/EvgS            |                           | -                   | +                  | +    | +    |
| FusR/FusK            | Fucose sensing            | +                   | -                  | +    | -    |
| GlnG/GlnL            | Nitrogen assimilation     | +                   | +                  | +    | +    |
| KdpE/KdpD            | Potassium transport       | +                   | +                  | +    | +    |
| NarL/NarX            | Nitrogen metabolism       | +                   | +                  | +    | +    |
| NarP/NarQ            | Nitrogen metabolism       | +                   | +                  | +    | +    |
| OmpR/EnvZ            | Osmotic regulation        | +                   | +                  | +    | +    |
| PhoB/PhoR            | Phosphate regulation      | +                   | +                  | +    | +    |
| PhoP/PhoQ            | Virulence                 | +                   | +                  | +    | +    |
| PmrA/PmrB            | LPS modifications         | +                   | +                  | +    | +    |
| QseB/QseC            | Quorum sensing            | +                   | +                  | +    | +    |
| QseF/QseE            | Amino sugar metabolism    | +                   | +                  | +    | +    |
| RcsB/RcsC/RcsD       | Capsule synthesis         | +                   | +                  | +    | +    |
| RstA/RstB            | Resistance mechanisms     | +                   | +                  | +    | +    |
| TctD/TctE            | Tricarboxylate transport  | +                   | -                  | -    | -    |
| TorR/TorS            |                           | -                   | +                  | +    | +    |
| UhpA/UhpB            | Hexose phosphate uptake   | +                   | +                  | +    | +    |
| UvrY/BarA            | Carbon metabolism         | +                   | +                  | +    | +    |
| YedW/YedV            | Copper homeostasis        | +                   | +                  | +    | +    |
| YehT/YehU            | Unknown                   | +                   | +                  | +    | +    |
| YpdB/YpdA            | Unknown                   | +                   | +                  | +    | +    |
| ZraR/ZraS            | Response to Zn            | +                   | +                  | +    | +    |

<sup>a</sup> To identify the TCSs encoded by *C. rodentium*, a BLAST search was performed against the *C. rodentium* genome using the DNA sequence of the *C. rodentium* *phoP* response regulator. This search identified 26 RR genes and their cognate HK sensors. Orphan RRs (*hnr*) and genes encoding chemotaxis proteins (*cheY* and *cheB*) were omitted. This list is in agreement with databases available online (Prokaryotic 2-Component Systems, P2CS, <http://www.p2cs.org> and Microbial Signal Transduction database, <http://mistdb.com>). With few exceptions, the *C. rodentium* genome shares the same TCSs as the prototypical A/E pathogens EHEC EDL933 and EPEC E2248/69.

**TABLE S5 Congo red binding to selected *C. rodentium* strains.**

| <b>Strains</b> | <b>Aerobic</b> |              | <b>Anaerobic</b> |              |
|----------------|----------------|--------------|------------------|--------------|
|                | <b>LB</b>      | <b>YESCA</b> | <b>LB</b>        | <b>YESCA</b> |
| Wild-type      | +              | +            | +                | +            |
| <i>ΔarcA</i>   | +              | +            | +                | +            |
| <i>ΔrcsB</i>   | ++             | ++           | ++               | ++           |
| <i>ΔuvrY</i>   | +              | +            | +/-              | +            |
